# Supplementary material for: Cloning, Expression Analysis, 20-Hydroxyecdysone Induction, and RNA Interference Study of Autophagy-Related Gene 8 from Heortia vitessoides Moore
Source: PubMed Central journal article supplement (PMC7240406; doi:10.3390/insects11040245), 2020-04-15
Supplement: insects-11-00245-s001.pdf [file insects-11-00245-s001.pdf]

Article

# Cloning, expression analysis, 20-hydroxyecdysone induction, and RNA interference study of autophagy-related gene 8 from *Heortia vitessoides* Moore

Zhixing Li, Zihao Lyu, Qingya Ye, Jie Cheng, Chunyan Wang and Tong Lin\*

College of Forestry and Landscape Architecture, South China Agricultural University, Guangzhou,

\* Correspondence: [lintong@scau.edu.cn](mailto:lintong@scau.edu.cn); Tel.: +86 020 85282217 (T.L.)

## Supplementary Materials

```

TATTGGAATACAACACTGCTTCCTGCATTGTCATATCAGCTGATTGCGTCATTGGGTTTA 60
TAGACAATAACGCAAAAACAAAAACAAGTCGTAGTATCCAGTTTGTCTATATTTGATT 120
ATCTCGAAATTTTCAGTGCATTTTCATTCTCAAGATGAAATCCAATATAAAGAGGAACAC 181
                                     M K F Q Y K E E H
TCGTTTGAAAAAGGAAGACTGAGGGAGAAAAATACGCAGGAAGTATCCGGACCGAGTT 241
S F E K R K T E G E K I R R K Y P D R V
CCAGTAATTGTTGAGAAAGCCCGAAGGCTAGACTGGAGACCTCGATAAGAAGAAGTAT 301
P V I V E K A P K A R L G D L D K K K Y
TTAGTGGCCTCTGATTTAACTGTTGGCAGTCTACTTCTTGATCAGAAAACGCATTAC 361
L V P S D L T V G Q F Y F L I R K R I H
TTGCGGCCCGAAGATGCGCTGTTCTTTGTCAACAATGTAATCCCTCCTACATCGGCC 421
L R P E D A L F F F V N N V I P P T S A
ACCATGGGCTCTTTGTACCAGGAACACCATGACGAAGATTTTTCTCTACATAGCATT 481
T M G S L Y Q E H H D E D F F L Y I A F
TCCGACGAGAATGTTTATGGATATTTTGAATCCACGATTTTCATCACCAGAATGTGAA 540
S D E N V Y G Y F *
ATTATATGATCATAATGGTGAACAGATTAAAGGCTTAGCTTAATGATTGATGATTAT 600
GTTATAATGGTGATAATTAATTTAATTGCAATTCTACAACAACCTGTCAAATCACA 660
TTGTTAGAGTTTAAACATCGGTTTAAATGAAAATATTGCATTGTTTAAATCTCTTTGTTG 720
GTTTAGGAGTGTGATTATTTCTGTATCAAAATAAATAAAAAAGTACAAAAAATGCGTC 780
TTTCTTTCATTCTAAAGGTATTAAGACCTTATTTTATGTGCTAAAGTATGGTTCATATA 840
GTTCACTTATATTATGAGACAGTAATGTCGTGAATTGTTCTATAAACCATCTACTG 900
GTCTAATTTACACAATTAATAATTCGGAAAACAACATACATATTAGGGAAAATACTATTA 960
ATATAATATTTACTCTGTATGAACAGAACATCATAATTAACAGTAAATCATTCTTA 1020
TACTTTAGATTTTATAGGTATTAATCTATTTCATGCG 1057

```

**Figure S1.** Sequence analysis of HvATG8. Nucleotide sequence of the cDNA encoding Atg8 isolated from *Heortia vitessoides* and the deduced amino acid sequence. The initiation codon and the termination codon are marked with a red underlines.

|        |                                                     |                            |     |
|--------|-----------------------------------------------------|----------------------------|-----|
| HvATG8 | MKFQYKEEHSFEKRRKTEGEKIRRKYPDRVPVIVEKAPKARLGDLDKKKYL | VPSDLTVGQF                 | 60  |
| SfATG8 | MKFQYKEEHSFEKRRKTEGEKIRRKYPDRVPVIVEKAPKARLGDLDKKKYL | VPSDLTVGQF                 | 60  |
| OfATG8 | MKFQYKEEHSFEKRRKTEGEKIRRKYPDRVPVIVEKAPKARLGDLDKKKYL | VPSDLTVGQF                 | 60  |
| SlATG8 | MKFQYKEEHSFEKRRKTEGEKIRRKYPDRVPVIVEKAPKARLGDLDKKKYL | VPSDLTVGQF                 | 60  |
| HaATG8 | MKFQYKEEHSFEKRRKTEGEKIRRKYPDRVPVIVEKAPKARLGDLDKKKYL | VPSDLTVGQF                 | 60  |
| TnATG8 | MKFQYKEEHSFEKRRKTEGEKIRRKYPDRVPVIVEKAPKARLGDLDKKKYL | VPSDLTVGQF                 | 60  |
| BmATG8 | MKFQYKEEHSFEKRAEGEKIRRKYPDRVPVIVEKAPKARLGDLDKKKYL   | VPSDLTVGQF                 | 60  |
| AaATG8 | MKFQYKEEHPFEKRAEGDKIRKYPDRVPVIVEKAPKARIGDLDKKEYL    | VPSDLTVGQF                 | 60  |
| TmATG8 | MKFQYKEEHPFEKRRSEGEKIRRKYPDRVPVIVEKAPRARIGDLDKKKYL  | VPSDLTVGQF                 | 60  |
| PaATG8 | MKFQYKEEHPFEKRAEGEKIRRKYPDRVPVIVEKAPKARIGDLDKKKYL   | VPSDLTVGQF                 | 60  |
|        | ***** ***:**:*:*****:*****:***:*****:*****          |                            |     |
| HvATG8 | YFLIRKRIHLRPEDALFFFV--NVIPPTSATMGSLYQEHHDDEFFLYIAFS | DENVYGYF--                 | 118 |
| SfATG8 | YFLIRKRIHLRPEDALFFFVNNVIPPTSATMGSLYQEHHDDEFFLYIAFS  | DENVYGY--                  | 118 |
| OfATG8 | YFLIRKRIHLRPEDALFFFVNNVIPPTSATMGSLYQEHHDDEFFLYIAFS  | DENVYGSF--                 | 117 |
| SlATG8 | YFLIRKRIHLRPEDALFFFVNNVIPPTSATMGSLYQEHHDDEFFLYIAFS  | DENVYGY---                 | 117 |
| HaATG8 | YFLIRKRIHLRPEDALFFFVNNVIPPTSATMGSLYQEHHDDEFFLYIAFS  | DENVYGY---                 | 117 |
| TnATG8 | YFLIRKRIHLRPEDALFFFVNNVIPPTSATMGSLYQEHHDDEFFLYIAFS  | DENVYGY---                 | 117 |
| BmATG8 | YFLIRKRIHLRPEDALFFFVNNVIPPTSATMGSLYQEHHDDEFFLYIAFS  | DENVYGN---                 | 117 |
| AaATG8 | YFLIRKRIHLRPEDALFFFVNNVIPPTSATMGSLYSEHHEEDYFLYIAYS  | DENVYGNK--                 | 118 |
| TmATG8 | YFLIRKRIHLRPEDALFFFVNNVIPPTSATMGSLYQEHHEEDFFLYIAYS  | DENVYGGDEL                 | 120 |
| PaATG8 | YFLIRKRIHLRPEDALFFFVNNVIPPTSATMGSLYQEHHEEDFFLYIAYS  | DENVYQG---                 | 117 |
|        | *****                                               | ***** ***:**:*:*****:***** |     |

**Figure S2.** Comparison of amino acid sequences of HvATG8 with Atg8 in other insects. SfATG8, *Spodoptera frugiperda* (SPODOBASE: Sf2M09420-5-1); OfATG8, *Ostrinia furnacalis* (AYU75107.1)SlATG8, *Spodoptera litura* (JX183217); HaATG8, *Helicoverpa armigera* (JQ739159); TnATG8, *Trichoplusia ni* (JX183216); BmATG8, *Bombyx mori* (NP\_001040244.1); TmATG8, *Tenebrio molitor* (KM676434.1); AaATG8, *Aedes aegypti* (AY736002.1) and PaATG8, *Periplaneta americana* (AB856588). Tyr49 and Leu50, which are required for the activation of the lipidated form of Atg8 by Atg7 and Atg3, are boxed in red. Phe77 and Phe 79, which are parts of the recognition site for Atg4, are boxed in pink (\* indicate identical residues).

### A Test of Between-Subjects Effects

Development Variable: Expression

| Source          | Type III Sum of Squares | df | Mean Square | F      | Sig.  |
|-----------------|-------------------------|----|-------------|--------|-------|
| Corrected Model | 1157.455 <sup>a</sup>   | 5  | 231.491     | 7.243  | 0.000 |
| intercept       | 768.239                 | 1  | 768.239     | 24.038 | 0.000 |
| species         | 404.772                 | 1  | 404.772     | 12.665 | 0.002 |
| Time            | 752.683                 | 4  | 188.171     | 5.888  | 0.002 |
| Error           | 767.029                 | 24 | 31.960      |        |       |
| Total           | 2692.723                | 30 |             |        |       |
| Corrected Total | 1924.484                | 29 |             |        |       |

a. R Squared = 0.601 ( Adjusted R Squared = 0.518 )

### B Test of Between-Subjects Effects

Development Variable: Expression

| Source          | Type III Sum of Squares | df | Mean Square | F       | Sig.  |
|-----------------|-------------------------|----|-------------|---------|-------|
| Corrected Model | 0.749 <sup>a</sup>      | 4  | 0.187       | 9.266   | 0.000 |
| intercept       | 17.710                  | 1  | 17.710      | 876.353 | 0.000 |
| species         | 0.511                   | 1  | 0.511       | 25.279  | 0.000 |
| Time            | 0.238                   | 3  | 0.079       | 3.928   | 0.024 |
| Error           | 0.384                   | 19 | 0.020       |         |       |
| Total           | 18.843                  | 24 |             |         |       |
| Corrected Total | 1.133                   | 23 |             |         |       |

a. R Squared = 0.661 ( Adjusted R Squared = 0.590 )

**Figure S3.** Some statistical results of two-way ANOVA. A represents the result of RNA interference; B represents the result of 20-hydroxyecdysone treatment.

**Table S1.** PCR primers used in this study.

| <b>Primers</b>           | <b>Primer sequence (5'–3')</b>             |
|--------------------------|--------------------------------------------|
| <b>For real-time PCR</b> |                                            |
| HvATG1-F                 | CGCACACCTCAACCCTC                          |
| HvATG1-R                 | GTCCGCTTTGGCATCAT                          |
| HvATG2-F                 | CTCGACAGACGACACCCAC                        |
| HvATG2-R                 | GCTGACAAGTCCACACGCT                        |
| HvATG3-F                 | TTACCGCTTAGTTCCGT                          |
| HvATG3-R                 | CCTGTGTTGCCTTTCTC                          |
| HvATG4-F                 | CGAATCCCGCCTACTAT                          |
| HvATG4-R                 | TCCTTCAATGCCCTCTC                          |
| HvATG5-F                 | ATGTCAACTATGCAGAAGAAGG                     |
| HvATG5-R                 | CAGTGGAGTATCCACAGGAAG                      |
| HvATG6-F                 | CATTATGTGCCTCCTTTTCG                       |
| HvATG6-R                 | CCTCCTTGTCATCTTCCAGC                       |
| HvATG7-F                 | CCTCCTTGTCATCTTCCAGC                       |
| HvATG7-R                 | TGGAATGTGGTATGGGA                          |
| HvATG8-F                 | TGAAAAAAGGAAGACTGAGGG                      |
| HvATG8-R                 | CGGAGAATGCTATGTAGAGG                       |
| HvATG9-F                 | TGCCGTGTGTTGGAGAT                          |
| HvATG9-R                 | GGGCGAAGTGAAGCTAG                          |
| HvATG12-F                | TCGGGTGGATTATGGAGTT                        |
| HvATG12-R                | ATTTGGTCTGGAGAGGGTG                        |
| HvATG13-F                | CGAGGATGGAGACGAAA                          |
| HvATG13-R                | ATAGGCGACCGAAAAAC                          |
| HvATG16-F                | CTGGTCTCCTGGCGTCTGT                        |
| HvATG16-R                | CGCTTGCTTCCTCCTTTTT                        |
| HvATG18-F                | AGCCACAAAACCTTAC                           |
| HvATG18-R                | GCACACCAGATCCAGAG                          |
| <b>For dsRNA</b>         |                                            |
| dsATG8-F                 | TAATACGACTCACTATAGGGAAAAGGAAGACTGAGGGAGA   |
| dsATG8-R                 | TAATACGACTCACTATAGGGCGGAGAATGCTATGTAGAGG   |
| dsGFP-F                  | TAATACGACTCACTATAGGGCAGTTCCTTGTTGAATTAGATG |
| dsGFP-R                  | TAATACGACTCACTATAGGGTTTGGTTTGTCTCCCATGATG  |

F: forward primer; R: reverse primer.

**Table S2.** GenBank accession number in this study.

| <b>Gene</b> | <b>Genbank number</b> |
|-------------|-----------------------|
| HvATG1      | MN788355              |
| HvATG2      | MN788356              |
| HvATG3      | MN788357              |
| HvATG4      | MN788358              |
| HvATG5      | MN788359              |
| HvATG6      | MN788360              |

---

|                   |          |
|-------------------|----------|
| HvATG7            | MN788361 |
| HvATG8            | MN788362 |
| HvATG9            | MN788363 |
| HvATG12           | MN788364 |
| HvATG13           | MN788365 |
| HvATG16           | MN788366 |
| HvATG18           | MN788367 |
| $\alpha$ -tubulin | MG132200 |

---
